# Supplementary material for: Solvent-free molten co-assembly of ordered mesoporous carbon for efficiently supported adsorption and separation of SO2
Source: Royal Society of Chemistry journal article supplement (doi:10.1039/d2ta00408a), 2022-01-01
Supplement: d2ta00408a1.pdf [file d2ta00408a1.pdf]

## Supporting Information

### **Solvent-Free Molten Co-Assembly to Ordered Mesoporous Carbon for Efficiently Supported Adsorption and Separation of SO<sub>2</sub>**

Xun Kan, Feiyu Song, Fangyao Li, Shuying Xiao, Fujian Liu\*, Lilong Jiang

National Engineering Research Center for Chemical Fertilizer Catalyst (NERC-CFC),

School of Chemical Engineering, Fuzhou University, Fuzhou, 350116, China.

E-mail: fjliu@fzu.edu.cn

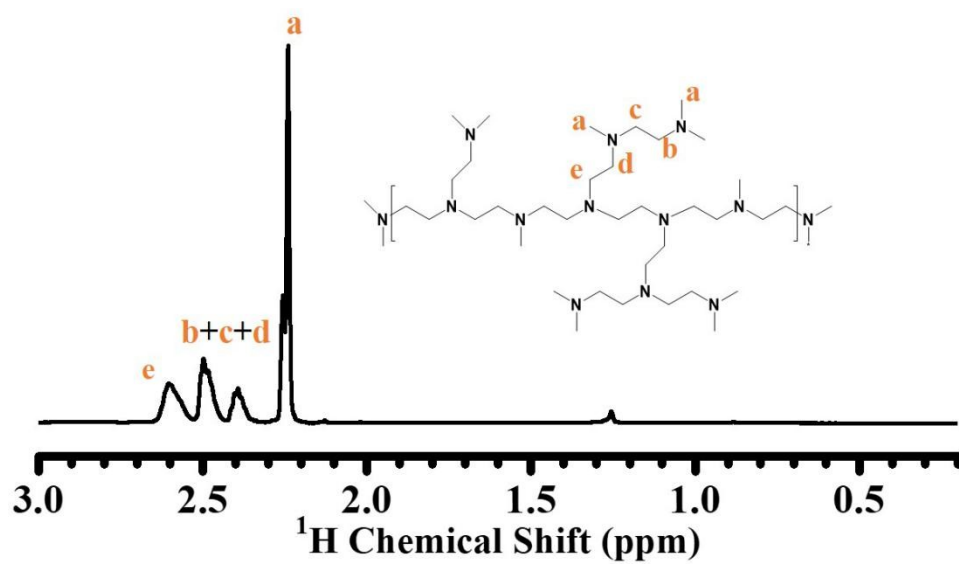

Figure S1  $^1\text{H}$  NMR spectra of mPEI.

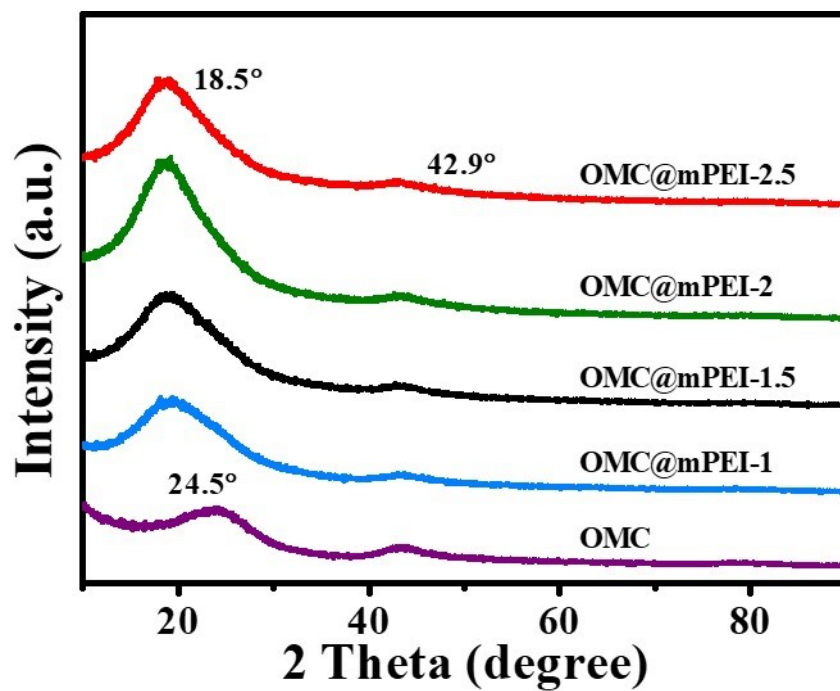

Figure S2 Wide-angle XRD patterns of OMC and various OMC@mPEI-x.

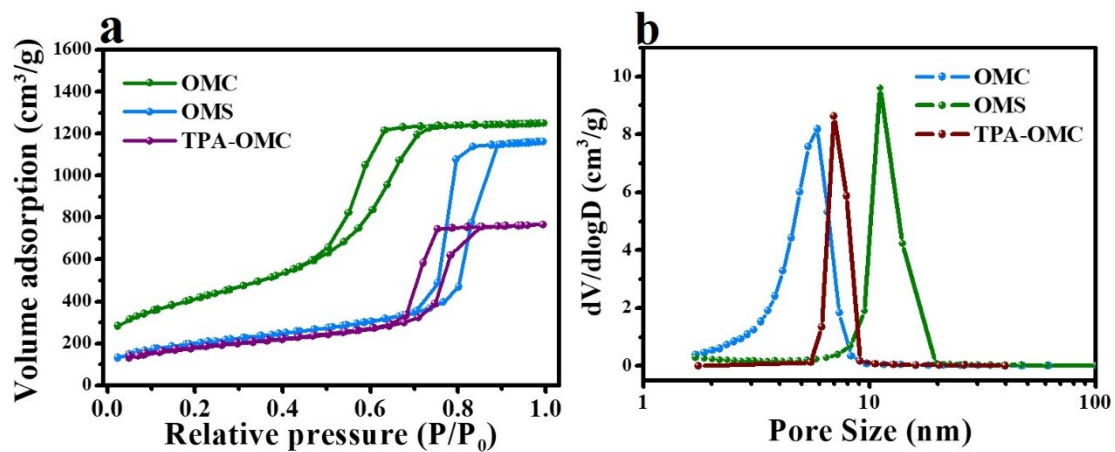

**Figure S3** (a) N<sub>2</sub> adsorption-desorption isotherms at -196 °C and (b) pore size distribution of OMC, OMS and TPA-OMC.

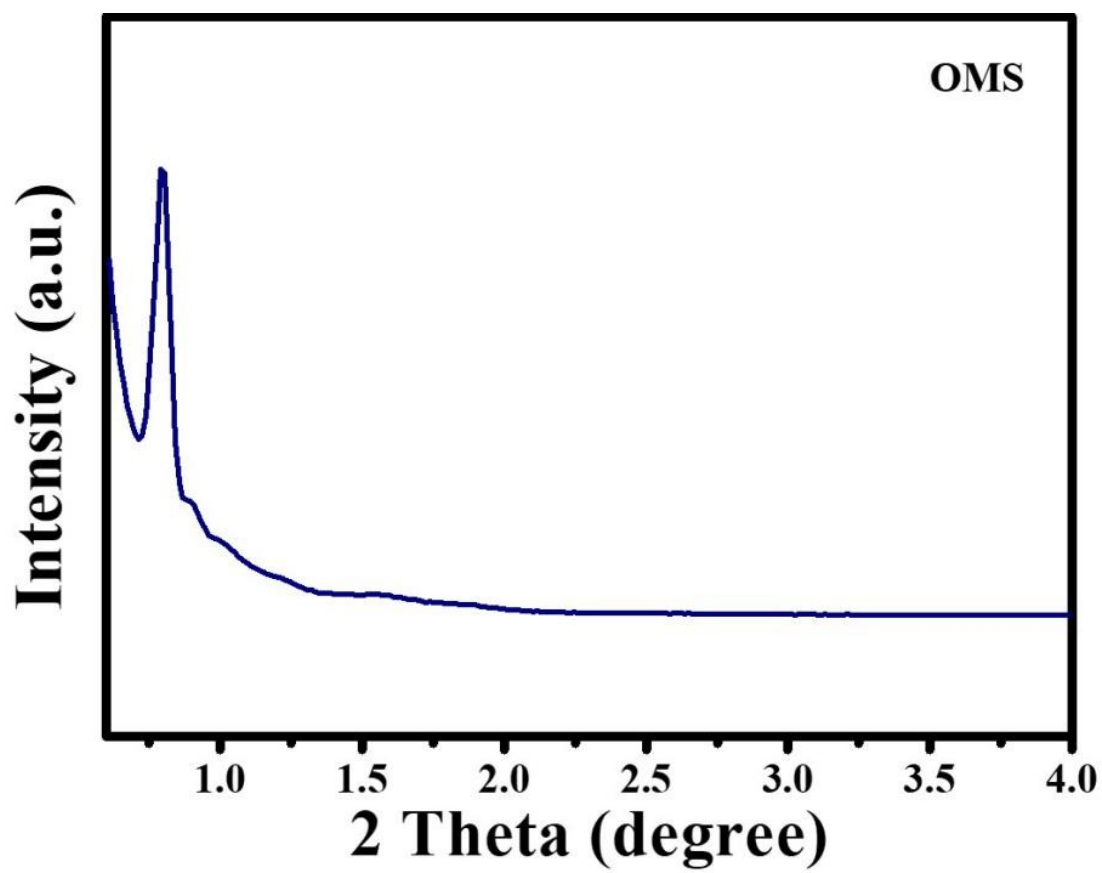

Figure S4 Low-angle XRD pattern of OMS.

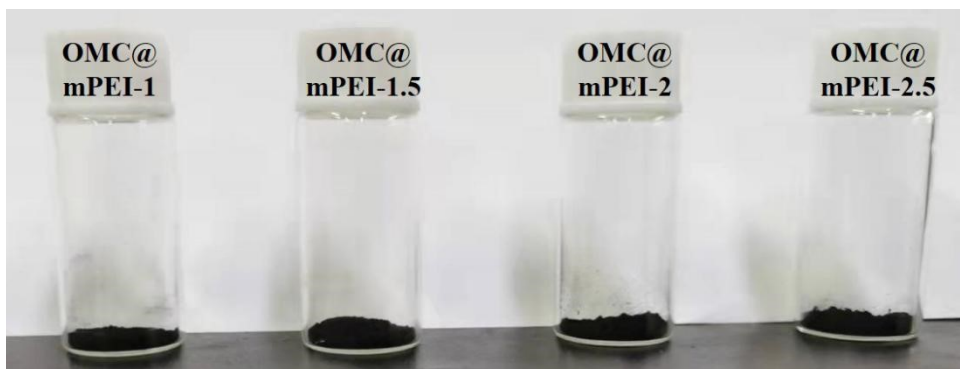

**Figure S5** Photographs of OMC and various OMC@mPEI-x.

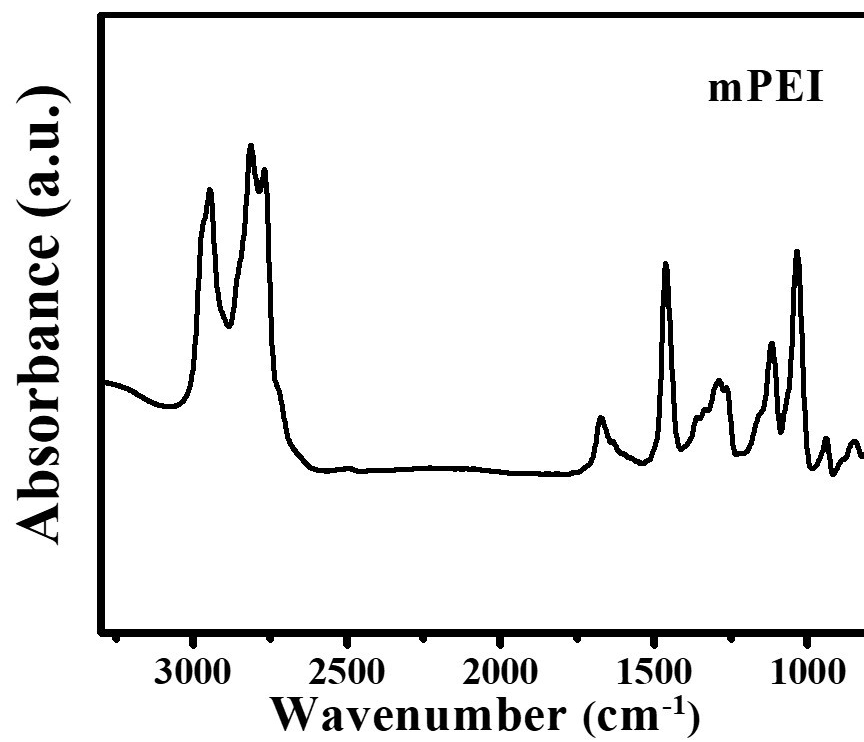

Figure S6 FT-IR spectra of mPEI.

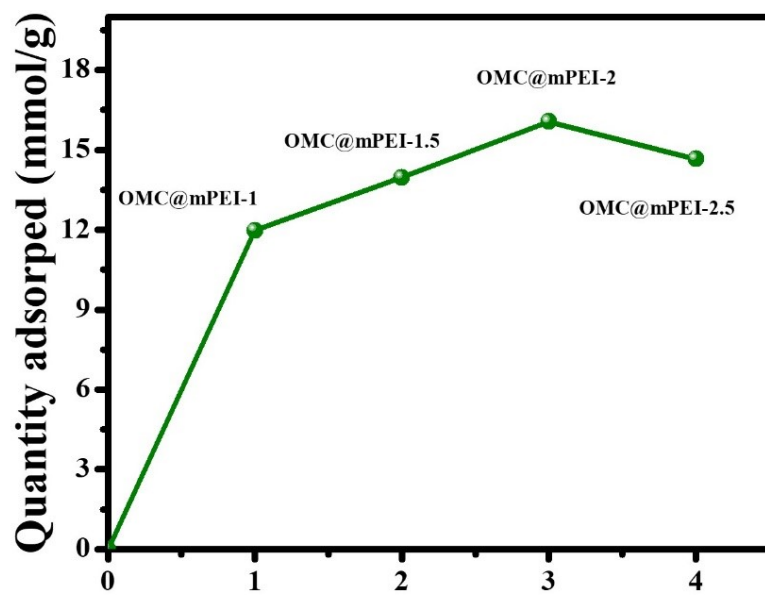

Figure S7 SO<sub>2</sub> adsorption capacities of OMC@mPEI-x samples at 25 °C and 1 bar.



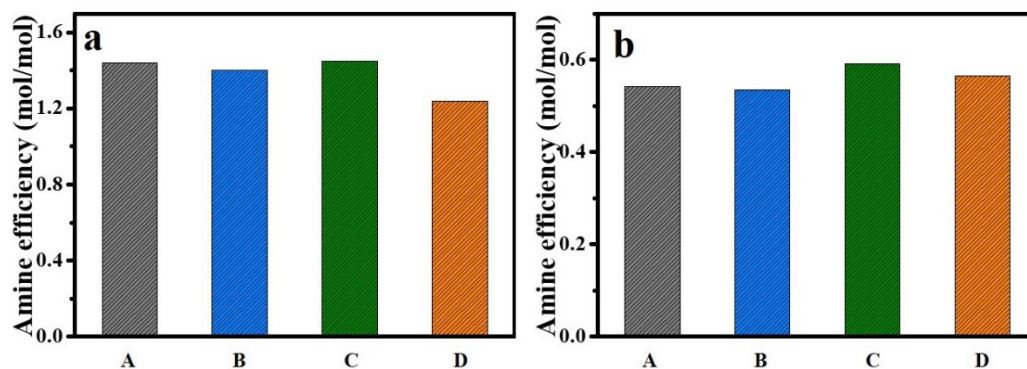

**Figure S8** mPEI efficiencies of (A) OMC@mPEI-1, (B) OMC@mPEI-1.5, (C) OMC@mPEI-2 and (D) OMC@mPEI-2.5 for SO<sub>2</sub> adsorption at 25 °C and different pressures: (a) 1 bar and (b) 0.002 bar.

Note: the mPEI utilization efficiency of OMC@mPEI-*x* was calculated from the following equations of S1 and S2:

$$M = \frac{x}{1+x} M_i \quad (\text{S1})$$

$$n = \frac{m}{M} \quad (\text{S2})$$

where *M* is the molar of tertiary amine group per g catalyst; *x* represents the mass ratio of mPEI to OMC; *n* is the utilization efficiency of mPEI; *m* is the adsorption capacity of SO<sub>2</sub> (mmol/g); (*M<sub>i</sub>* = 16.6 mmol/g for the molar of tertiary amine group per g PEI).

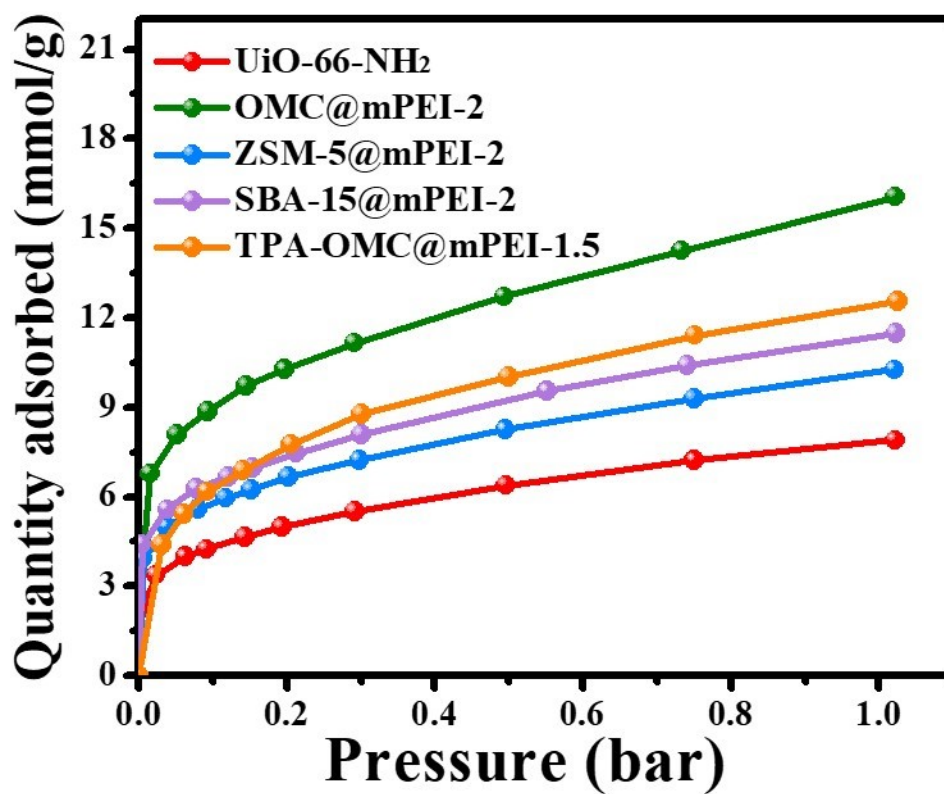

Figure S9 SO<sub>2</sub> adsorption isotherm of UiO-66-NH<sub>2</sub>, OMC@mPEI-2, ZSM-5@mPEI-2, SBA-15@mPEI-2, and TPA-OMC@mPEI-1.5 at 25 °C and 1 bar.

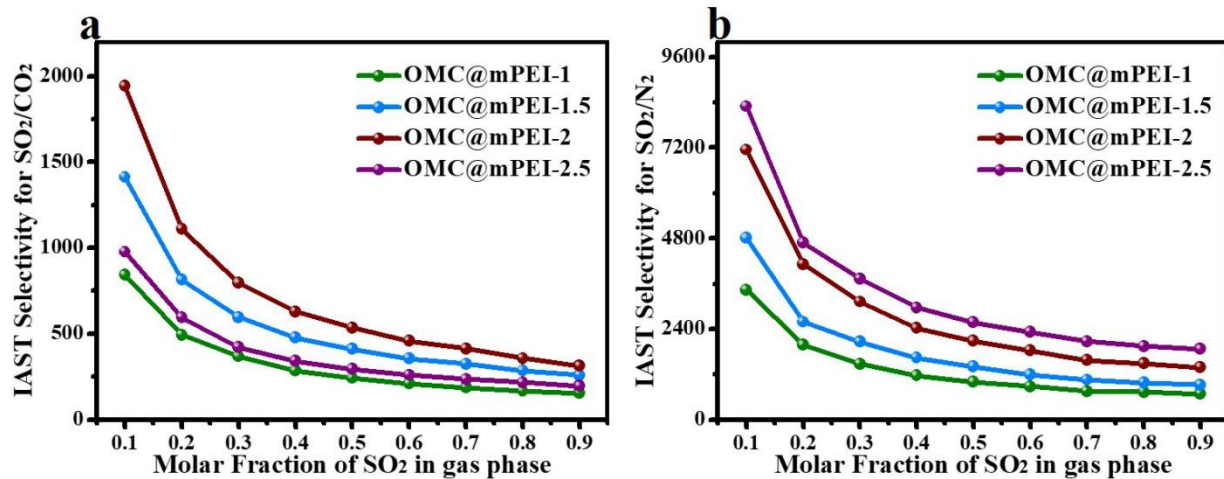

**Figure S10** IAST selectivities of OMC@mPEI-x for (a) SO<sub>2</sub>/CO<sub>2</sub> and (b) SO<sub>2</sub>/N<sub>2</sub> at 50

°C.

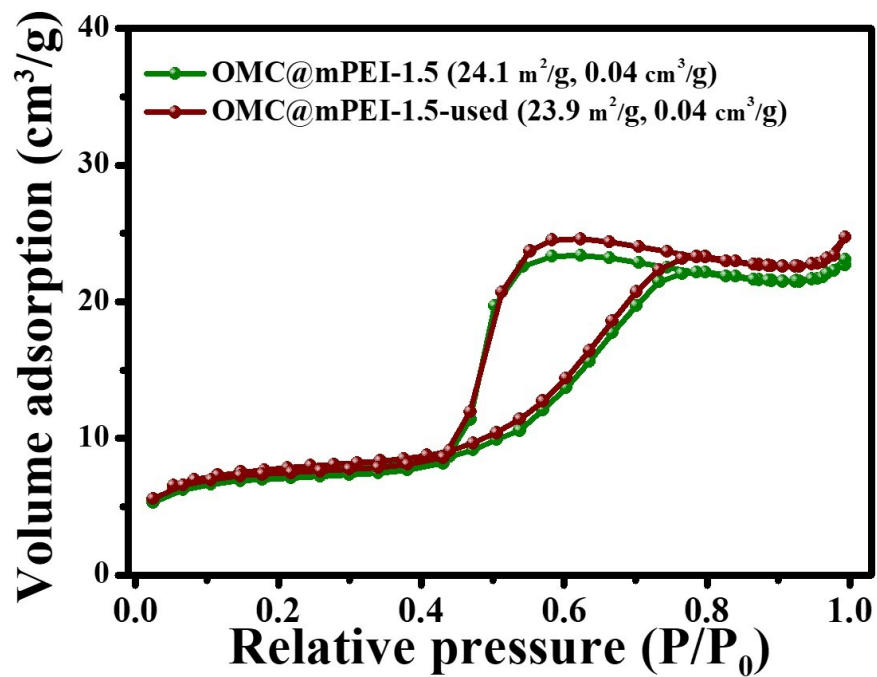

**Figure S11** N<sub>2</sub> adsorption-desorption isotherms at -196 °C of fresh OMC@mPEI-1.5 and used OMC@mPEI-1.5 in SO<sub>2</sub> adsorption.

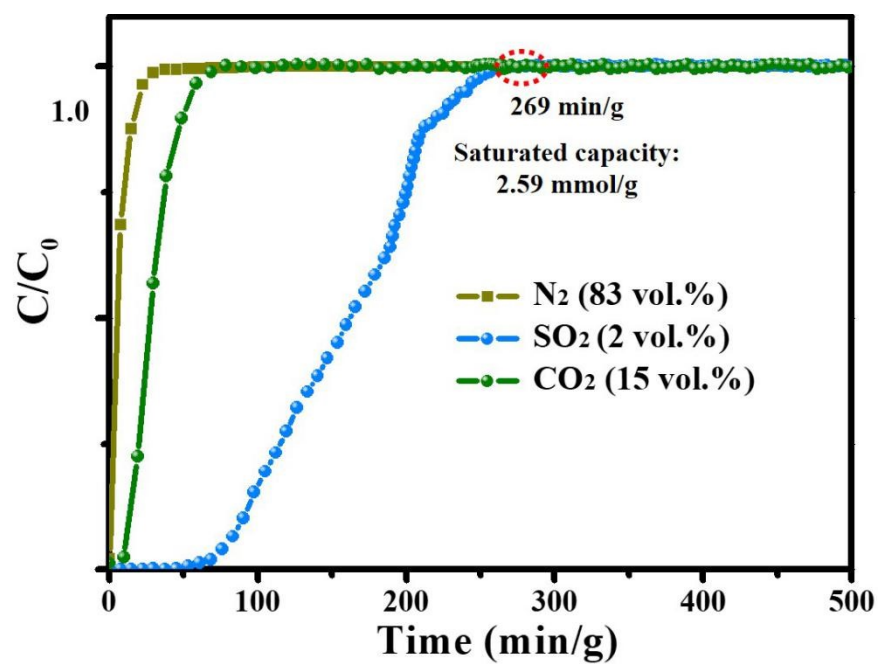

**Figure S12** Breakthrough curves of SBA-15@mPEI-2 for SO<sub>2</sub>/CO<sub>2</sub>/N<sub>2</sub> gas mixture (20 mL/min) at 25 °C

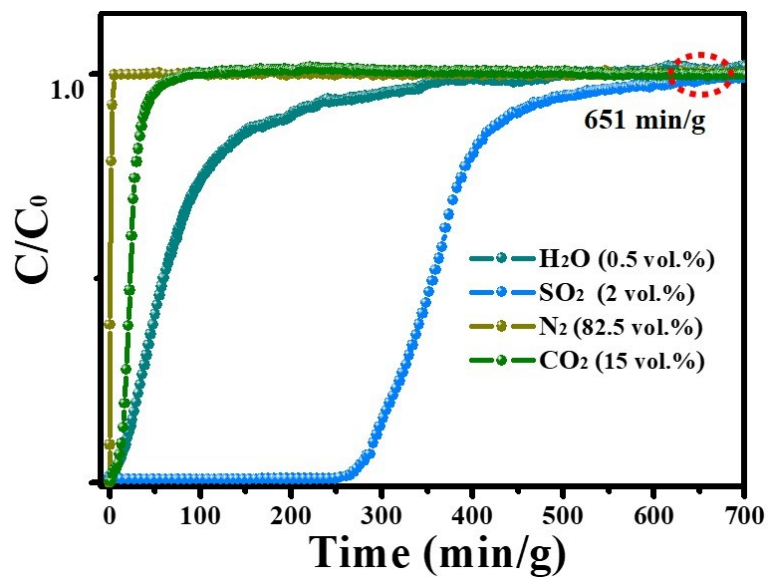

**Figure S13** Breakthrough curves of OMC@mPEI-2 for  $\text{SO}_2/\text{CO}_2/\text{N}_2/\text{H}_2\text{O}$  gas mixture (20 mL/min) at 25 °C

**Table S1** SO<sub>2</sub> capacities of different porous solid adsorbents.

| Samples                | Condition        | SO <sub>2</sub> capacities<br>(mmol/g) | Ref.      |
|------------------------|------------------|----------------------------------------|-----------|
| OMC@mPEI-2             | 25 °C, 1.0 bar   | 16.1                                   | This work |
| OMC@mPEI-2             | 25 °C, 0.002 bar | 3.9                                    | This work |
| UiO-66-NH <sub>2</sub> | 25 °C, 1.0 bar   | 7.9                                    | This work |
| ZSM-5@mPEI-2           | 25 °C, 1.0 bar   | 10.1                                   | This work |
| SBA-15@mPEI-2          | 25 °C, 1.0 bar   | 11.5                                   | This work |
| TPA-OMC@mPEI-1.5       | 25 °C, 1.0 bar   | 12.5                                   | This work |
| P(Ph-4MVIm-Br)         | 25 °C, 0.002 bar | 1.6                                    | (S1)      |
| SIFSIX-2-Cu-i          | 25 °C, 0.002 bar | 2.3                                    | (S2)      |
| DT-NPC-3               | 25 °C, 0.1 bar   | 5.2                                    | (S3)      |
| ACT                    | 25 °C, 1.0 bar   | 7.9                                    | (S4)      |
| CFT-CSU38              | 25 °C, 0.1 bar   | 7.9                                    | (S5)      |
| MIL-160                | 25 °C, 0.97 bar  | 7.3                                    | (S6)      |
| Mg-MOF-74              | 25 °C, 1.0 bar   | 8.6                                    | (S7)      |
| MFM-600                | 25 °C, 1.0 bar   | 5.0                                    | (S8)      |
| MFM-300(In)            | 25 °C, 1.0 bar   | 8.3                                    | (S9)      |
| MFM-300(Al)            | 25 °C, 1.0 bar   | 7.1                                    | (S10)     |
| MFM-202a               | 25 °C, 1.0 bar   | 10.2                                   | (S11)     |
| GU-1                   | 25 °C, 1.0 bar   | 7.6                                    | (S12)     |
| HNIP-TBMB-1            | 25 °C, 1.0 bar   | 7.2                                    | (S13)     |

**Table S2** IAST selectivities of different porous solid adsorbents.

| Samples       | Condition                                                | Temperature | IAST selectivity | Ref.      |
|---------------|----------------------------------------------------------|-------------|------------------|-----------|
| OMC@mPEI-2    | SO <sub>2</sub> /CO <sub>2</sub><br>(0.1:0.9 v/v, 1 bar) | 25 °C       | 1789             | This work |
| SIFSIX-2-Cu-i | SO <sub>2</sub> /CO <sub>2</sub><br>(0.1:0.9 v/v, 1 bar) | 25 °C       | 87.1             | (S2)      |
| ELM-12        | SO <sub>2</sub> /CO <sub>2</sub><br>(0.1:0.9 v/v, 1 bar) | 25 °C       | 30               | (S2)      |
| MIL-160       | SO <sub>2</sub> /CO <sub>2</sub><br>(0.1:0.9 v/v, 1 bar) | 25 °C       | 124              | (S6)      |
| MFM-601       | SO <sub>2</sub> /CO <sub>2</sub><br>(0.1:0.9 v/v, 1 bar) | 25 °C       | 67.5             | (S8)      |
| MFM-300(In)   | SO <sub>2</sub> /CO <sub>2</sub>                         | 25 °C       | 33.6             | (S9)      |



|            |                                                              |       |      |       |
|------------|--------------------------------------------------------------|-------|------|-------|
|            | (0.1:0.9 v/v, 1 bar)                                         |       |      |       |
| Mg-gallate | SO <sub>2</sub> /CO <sub>2</sub><br>(0.1:0.9 v/v, 1 bar)     | 25 °C | 321  | (S14) |
| Co-gallate | SO <sub>2</sub> /CO <sub>2</sub><br>(0.1:0.9 v/v, 1 bar)     | 25 °C | 143  | (S14) |
| MFM-170    | SO <sub>2</sub> /CO <sub>2</sub><br>(0.1:0.9 v/v, 1 bar)     | 25 °C | 32   | (S15) |
| NKU-100    | SO <sub>2</sub> /CO <sub>2</sub><br>(0.5:0.5 v/v, 100000 Pa) | 25 °C | 940  | (S16) |
| DMOF-TM    | SO <sub>2</sub> /CO <sub>2</sub><br>(0.1:0.9 v/v, 1 bar)     | 25 °C | 169  | (S17) |
| ECUT-111   | SO <sub>2</sub> /CO <sub>2</sub><br>(1:99 v/v, 1 bar)        | 25 °C | 25.2 | (S18) |
| HBU-20     | SO <sub>2</sub> /CO <sub>2</sub>                             | 25 °C | 44.3 | (S19) |

|                |                                  |       |     |       |
|----------------|----------------------------------|-------|-----|-------|
|                | (0.1:0.9 v/v, 1 bar)             |       |     |       |
| 2.0mPEI@g-C3N4 | SO <sub>2</sub> /CO <sub>2</sub> | 25 °C | 630 | (S20) |
|                | (0.1:0.9 v/v, 1 bar)             |       |     |       |

---

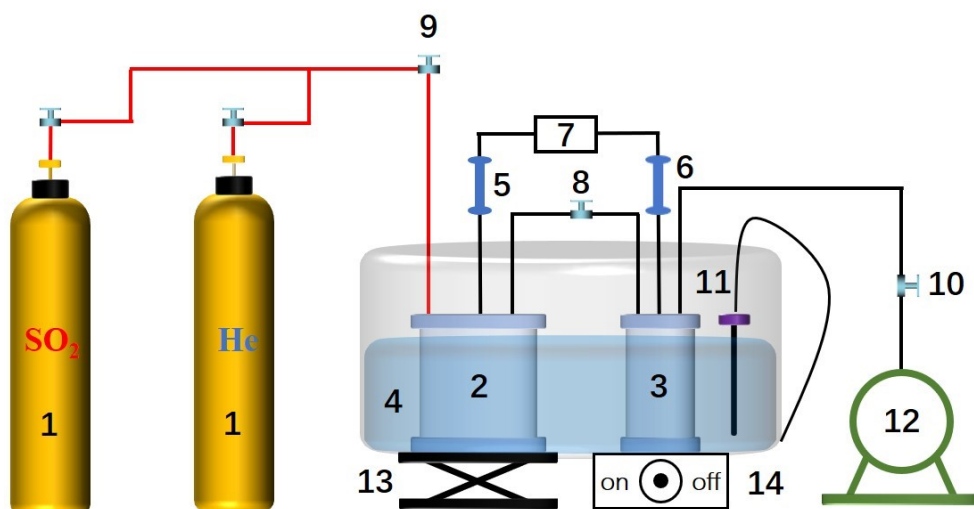

**Scheme S1** Diagram for dual-chamber equipment used for measurements of SO<sub>2</sub> adsorption isotherms (1: gas cylinder; 2: storage chamber; 3: adsorption chamber; 4: water bath; 5~6: pressure transducers; 7: digital display; 8~10: needle valve; 11: temperature probe; 12: vacuum pump; 13: elevator platform; 14: magnetic stirrer).

Measuring procedures:

The equipment has two chambers made of 316 L stainless steel: one is used for the storage of SO<sub>2</sub>, and the other is used for the adsorption of SO<sub>2</sub>. The temperature of two chambers is controlled by a water bath. The pressures in two chambers are monitored by two Wideplus-8 transducers respectively. In a typical run, a certain amount of sample was placed in the adsorption chamber; the equipment was completely evacuated by a pump, and a certain amount of SO<sub>2</sub> was introduced to the storage chamber from the cylinder; after stabilization, the pressure in storage chamber was recorded as  $P_0$ ; then a certain amount of SO<sub>2</sub> was introduced to the adsorption chamber from the storage chamber; after stabilization, the pressures in storage chamber and adsorption chamber were recorded as  $P_1$  and  $P_2$  respectively; the amount of SO<sub>2</sub> adsorbed at the equilibrium pressure of  $P_2$  was calculated using the following equation:

$$n = \rho_0 V_1 - \rho_1 V_1 - \rho_2 V_2 \quad (\text{S3})$$

where  $n$  is the amount of SO<sub>2</sub> adsorbed;  $\rho_i$  is the density of SO<sub>2</sub> at  $P_i$  ( $i=0\sim 2$ );  $V_j$  is the free volume of chamber ( $j=1$  for storage chamber and 2 for adsorption chamber). The values of  $\rho_i$

were obtained from the NIST Chemistry WebBook.<sup>S21</sup> The values of  $V_j$  were measured using He as the probing gas. The amounts of SO<sub>2</sub> adsorbed at elevated pressures were measured by loading more SO<sub>2</sub> to the adsorption chamber. The amounts of SO<sub>2</sub> adsorbed were finally transformed to mmol of SO<sub>2</sub> per gram of sample.

Density functional theory (DFT) calculation

Density functional theory (DFT) calculations were conducted using Gaussian 16 program.<sup>S21</sup> Geometry optimizations and frequency calculations was performed with the wb97XD hybrid exchange-correlation functional with the def2-SVP basis set Single-point energies were further calculated with the wb97XD hybrid exchange-correlation functional with a larger basis set def2-TZVP basis set.<sup>S22,S23</sup> The energies reported here refer to the single-point energies.

*N,N*-dimethylethanamine, *N*-ethyl-*N*-methylethanamine and triethylamine were used to represent the three kinds of tertiary amine species, and for each model, the adsorption energy ( $\Delta E$ ) was calculated according to the equation below:

$$\Delta E = E(\text{amine\_SO}_2) - E(\text{amine}) - E(\text{SO}_2)$$

Where  $E(\text{amine\_SO}_2)$ ,  $E(\text{amine})$  and  $E(\text{SO}_2)$  are the energies of optimized model of adsorbed SO<sub>2</sub>, amine and SO<sub>2</sub>, respectively.

Bond distances are in angstrom.

Bond distances are in angstrom.

Single-point energies (a.u.) and Cartesian coordinates

SO<sub>2</sub>

E = -548.6516585

|   |              |              |             |
|---|--------------|--------------|-------------|
| S | 0.000000000  | 0.370418000  | 0.000000000 |
| O | 1.246194000  | -0.370418000 | 0.000000000 |
| O | -1.246194000 | -0.370418000 | 0.000000000 |

S20

*N,N*-dimethylethanamine

E = -213.8001251

|   |              |              |              |
|---|--------------|--------------|--------------|
| N | 0.456881000  | -0.003335000 | -0.296842000 |
| C | 0.627537000  | 1.377046000  | 0.091788000  |
| H | 1.504121000  | 1.803717000  | -0.418623000 |
| H | -0.244401000 | 1.979355000  | -0.199879000 |
| H | 0.778952000  | 1.505021000  | 1.189216000  |
| C | 1.657358000  | -0.772797000 | -0.071292000 |
| H | 1.531870000  | -1.796614000 | -0.455727000 |
| H | 2.506177000  | -0.316792000 | -0.603618000 |
| H | 1.935711000  | -0.847302000 | 1.005652000  |
| C | -0.708860000 | -0.632221000 | 0.296150000  |
| H | -0.690476000 | -1.695587000 | 0.006835000  |
| H | -0.654297000 | -0.616266000 | 1.411545000  |
| C | -2.032036000 | -0.030014000 | -0.156267000 |
| H | -2.871278000 | -0.638619000 | 0.211171000  |
| H | -2.179857000 | 0.991588000  | 0.224090000  |
| H | -2.078681000 | 0.002767000  | -1.255040000 |

*N,N*-dimethylethanamine-SO<sub>2</sub>

E = -762.472943

|   |              |             |              |
|---|--------------|-------------|--------------|
| N | -0.686793000 | 0.568604000 | 0.151174000  |
| C | -1.069716000 | 1.341533000 | -1.017454000 |
| H | -0.234861000 | 2.001586000 | -1.291837000 |
| H | -1.268682000 | 0.678621000 | -1.870117000 |

|   |              |              |              |
|---|--------------|--------------|--------------|
| H | -1.969237000 | 1.958656000  | -0.830501000 |
| C | -0.238232000 | 1.411568000  | 1.247683000  |
| H | 0.141416000  | 0.774509000  | 2.059479000  |
| H | 0.588139000  | 2.047924000  | 0.899816000  |
| H | -1.055457000 | 2.048168000  | 1.634346000  |
| C | -1.654039000 | -0.433836000 | 0.599763000  |
| H | -1.158156000 | -0.996698000 | 1.406370000  |
| H | -2.532545000 | 0.071745000  | 1.049823000  |
| C | -2.110504000 | -1.401388000 | -0.480314000 |
| H | -2.720697000 | -2.192281000 | -0.022258000 |
| H | -2.727337000 | -0.915843000 | -1.250205000 |
| H | -1.254098000 | -1.883874000 | -0.974024000 |
| S | 1.316167000  | -0.555454000 | -0.397392000 |
| O | 2.087566000  | 0.669444000  | -0.613302000 |
| O | 1.459351000  | -1.193535000 | 0.912190000  |

*N*-ethyl-*N*-methylethanamine

E = -253.1167972

|   |              |             |              |
|---|--------------|-------------|--------------|
| N | 0.002783000  | 0.371870000 | -0.190165000 |
| C | -0.561972000 | 1.699928000 | -0.115224000 |
| H | 0.045678000  | 2.403462000 | -0.703925000 |
| H | -1.577286000 | 1.717320000 | -0.535726000 |
| H | -0.622379000 | 2.090253000 | 0.927099000  |
| C | 1.390436000  | 0.350657000 | 0.242281000  |
| H | 1.872508000  | 1.256571000 | -0.158228000 |
| H | 1.473100000  | 0.428574000 | 1.351901000  |

|   |              |              |              |
|---|--------------|--------------|--------------|
| C | -0.818196000 | -0.620172000 | 0.482837000  |
| H | -0.242427000 | -1.555028000 | 0.543937000  |
| H | -1.025299000 | -0.318828000 | 1.537224000  |
| C | -2.128789000 | -0.920155000 | -0.233179000 |
| H | -2.652058000 | -1.751725000 | 0.261713000  |
| H | -2.813821000 | -0.059459000 | -0.234622000 |
| H | -1.933166000 | -1.201742000 | -1.278390000 |
| C | 2.171585000  | -0.860793000 | -0.250352000 |
| H | 1.811484000  | -1.803132000 | 0.188293000  |
| H | 2.091707000  | -0.942965000 | -1.344278000 |
| H | 3.234087000  | -0.763178000 | 0.017978000  |

*N*-ethyl-*N*-methylethanamine-SO<sub>2</sub>

E = -801.7888257

|   |              |              |              |
|---|--------------|--------------|--------------|
| N | 0.717785000  | 0.018308000  | 0.389995000  |
| C | 1.615197000  | -0.684312000 | -0.531773000 |
| H | 1.514425000  | -0.204713000 | -1.516714000 |
| H | 2.666754000  | -0.532549000 | -0.210627000 |
| C | 0.545725000  | -0.642794000 | 1.673691000  |
| H | -0.110930000 | -0.026620000 | 2.303491000  |
| H | 0.052328000  | -1.614352000 | 1.539461000  |
| H | 1.511103000  | -0.784964000 | 2.195349000  |
| C | 1.051877000  | 1.434010000  | 0.573091000  |
| H | 0.239107000  | 1.868167000  | 1.175460000  |
| H | 1.983239000  | 1.514890000  | 1.169978000  |
| C | 1.189921000  | 2.238541000  | -0.709526000 |

|   |              |              |              |
|---|--------------|--------------|--------------|
| H | 1.322200000  | 3.298366000  | -0.450283000 |
| H | 2.057475000  | 1.937949000  | -1.313924000 |
| H | 0.282661000  | 2.163100000  | -1.325986000 |
| S | -1.496912000 | -0.011028000 | -0.512775000 |
| O | -1.893403000 | -1.298142000 | 0.061823000  |
| O | -1.953421000 | 1.180294000  | 0.204111000  |
| C | 1.329169000  | -2.171932000 | -0.678978000 |
| H | 0.268517000  | -2.356244000 | -0.900251000 |
| H | 1.932717000  | -2.575029000 | -1.504399000 |
| H | 1.589765000  | -2.738019000 | 0.226378000  |

triethylamine

E = -292.4337314

|   |              |              |              |
|---|--------------|--------------|--------------|
| N | 0.000403000  | 0.000036000  | 0.059334000  |
| C | -0.314619000 | -1.364258000 | 0.451843000  |
| H | 0.611525000  | -1.956787000 | 0.407994000  |
| H | -0.650401000 | -1.411189000 | 1.513091000  |
| C | -1.023108000 | 0.954992000  | 0.453450000  |
| H | -1.999160000 | 0.448499000  | 0.414125000  |
| H | -0.892320000 | 1.271397000  | 1.513569000  |
| C | 1.339400000  | 0.408929000  | 0.452545000  |
| H | 1.389075000  | 1.507402000  | 0.411405000  |
| H | 1.548127000  | 0.139090000  | 1.513111000  |
| C | 2.429186000  | -0.149890000 | -0.452859000 |
| H | 3.419626000  | 0.210982000  | -0.136739000 |
| H | 2.458762000  | -1.249874000 | -0.434698000 |



|   |              |              |              |
|---|--------------|--------------|--------------|
| H | 2.254613000  | 0.163675000  | -1.492455000 |
| C | -1.085495000 | 2.177483000  | -0.452797000 |
| H | -0.147234000 | 2.752464000  | -0.437196000 |
| H | -1.272126000 | 1.868739000  | -1.491738000 |
| H | -1.892160000 | 2.855575000  | -0.135576000 |
| C | -1.345602000 | -2.027270000 | -0.452119000 |
| H | -1.528164000 | -3.065681000 | -0.136661000 |
| H | -2.312714000 | -1.502440000 | -0.431509000 |
| H | -0.988841000 | -2.032020000 | -1.492441000 |

triethylamine-SO<sub>2</sub>

E = -841.1047165

|   |             |              |              |
|---|-------------|--------------|--------------|
| N | 0.712741000 | -0.003634000 | 0.233580000  |
| C | 1.667104000 | -0.672224000 | -0.660061000 |
| H | 1.632891000 | -0.148720000 | -1.626397000 |
| H | 2.694967000 | -0.541353000 | -0.263385000 |
| C | 0.473456000 | -0.760452000 | 1.470192000  |
| H | 0.001397000 | -1.709290000 | 1.178801000  |
| H | 1.448578000 | -1.004528000 | 1.939767000  |
| C | 1.047421000 | 1.403212000  | 0.481646000  |
| H | 0.181177000 | 1.855789000  | 0.982969000  |
| H | 1.903070000 | 1.455688000  | 1.185531000  |
| C | 1.351301000 | 2.227432000  | -0.760315000 |
| H | 1.459423000 | 3.280256000  | -0.463909000 |
| H | 2.283672000 | 1.930059000  | -1.260403000 |
| H | 0.524409000 | 2.176197000  | -1.483066000 |

|   |              |              |              |
|---|--------------|--------------|--------------|
| S | -1.369669000 | 0.003504000  | -0.909714000 |
| O | -1.890975000 | -1.228379000 | -0.311443000 |
| O | -1.875081000 | 1.256604000  | -0.343376000 |
| C | 1.393600000  | -2.150820000 | -0.901699000 |
| H | 0.347316000  | -2.326519000 | -1.189503000 |
| H | 2.040195000  | -2.504480000 | -1.717195000 |
| H | 1.610466000  | -2.767983000 | -0.019007000 |
| C | -0.439335000 | -0.077836000 | 2.479102000  |
| H | 0.023777000  | 0.801161000  | 2.948946000  |
| H | -1.386573000 | 0.226348000  | 2.013713000  |
| H | -0.672083000 | -0.794929000 | 3.278872000  |

CO<sub>2</sub>

E = -188.6055421

|   |             |             |              |
|---|-------------|-------------|--------------|
| C | 0.000000000 | 0.000000000 | 0.000000000  |
| O | 0.000000000 | 0.000000000 | 1.158564000  |
| O | 0.000000000 | 0.000000000 | -1.158564000 |

*N,N*-dimethylethanamine-CO<sub>2</sub>

E = -402.4128763

|   |              |              |              |
|---|--------------|--------------|--------------|
| N | -0.622630000 | -0.523658000 | -0.107019000 |
| C | -0.950914000 | -1.136575000 | 1.162145000  |
| H | -0.192169000 | -1.891976000 | 1.413045000  |
| H | -0.948242000 | -0.391742000 | 1.969756000  |
| H | -1.946832000 | -1.633574000 | 1.154708000  |
| C | -0.479591000 | -1.515824000 | -1.150809000 |

|   |              |              |              |
|---|--------------|--------------|--------------|
| H | -0.148655000 | -1.036490000 | -2.084888000 |
| H | 0.279128000  | -2.258842000 | -0.861682000 |
| H | -1.426649000 | -2.059823000 | -1.364103000 |
| C | -1.533368000 | 0.539757000  | -0.502142000 |
| H | -1.212524000 | 0.887406000  | -1.497099000 |
| H | -2.569359000 | 0.146708000  | -0.627024000 |
| C | -1.551849000 | 1.731598000  | 0.443507000  |
| H | -2.175390000 | 2.532597000  | 0.020486000  |
| H | -1.970097000 | 1.480992000  | 1.429424000  |
| H | -0.536013000 | 2.128534000  | 0.584533000  |
| O | 2.274733000  | -0.539431000 | 0.716153000  |
| O | 1.778985000  | 1.278647000  | -0.634358000 |
| C | 1.978300000  | 0.355726000  | 0.040234000  |

*N*-ethyl-*N*-methylethanamine-CO<sub>2</sub>

E = -441.7295949

|   |              |              |              |
|---|--------------|--------------|--------------|
| N | 0.623480000  | 0.165891000  | 0.392572000  |
| C | 1.559368000  | -0.437127000 | -0.545599000 |
| H | 1.333812000  | -0.041476000 | -1.545874000 |
| H | 2.604996000  | -0.126768000 | -0.312110000 |
| C | 0.822824000  | -0.278566000 | 1.756736000  |
| H | 0.067118000  | 0.182458000  | 2.408718000  |
| H | 0.702009000  | -1.367366000 | 1.837453000  |
| H | 1.829164000  | -0.013969000 | 2.151638000  |
| C | 0.615598000  | 1.621826000  | 0.329861000  |
| H | -0.109345000 | 1.969981000  | 1.083047000  |

|   |              |              |              |
|---|--------------|--------------|--------------|
| H | 1.604036000  | 2.036287000  | 0.636839000  |
| C | 0.227722000  | 2.203289000  | -1.023377000 |
| H | 0.062713000  | 3.286198000  | -0.926452000 |
| H | 1.007858000  | 2.062006000  | -1.785113000 |
| H | -0.699433000 | 1.747779000  | -1.402083000 |
| O | -1.833435000 | -0.858845000 | -1.181768000 |
| O | -2.322166000 | -0.125660000 | 0.962664000  |
| C | 1.482988000  | -1.955934000 | -0.615801000 |
| H | 0.450428000  | -2.280623000 | -0.810432000 |
| H | 2.115452000  | -2.321043000 | -1.438019000 |
| H | 1.835838000  | -2.442189000 | 0.305278000  |
| C | -2.029200000 | -0.482899000 | -0.101497000 |

triethylamine-CO<sub>2</sub>

E = -481.0449936

|   |             |              |              |
|---|-------------|--------------|--------------|
| N | 0.646150000 | 0.013029000  | 0.150437000  |
| C | 1.504982000 | -0.663615000 | -0.816467000 |
| H | 1.438850000 | -0.113543000 | -1.765426000 |
| H | 2.572439000 | -0.604757000 | -0.497201000 |
| C | 0.622152000 | -0.689941000 | 1.428241000  |
| H | 0.266311000 | -1.712369000 | 1.239317000  |
| H | 1.653775000 | -0.786701000 | 1.841497000  |
| C | 1.006392000 | 1.418269000  | 0.306052000  |
| H | 0.279985000 | 1.875041000  | 0.992297000  |
| H | 2.005351000 | 1.514814000  | 0.793120000  |
| C | 0.995494000 | 2.230773000  | -0.982083000 |

|   |              |              |              |
|---|--------------|--------------|--------------|
| H | 1.086419000  | 3.299611000  | -0.739795000 |
| H | 1.827773000  | 1.979612000  | -1.655068000 |
| H | 0.048739000  | 2.086228000  | -1.522277000 |
| O | -2.136410000 | -1.204477000 | -0.572610000 |
| O | -2.188778000 | 1.112774000  | -0.571073000 |
| C | 1.144324000  | -2.117368000 | -1.094444000 |
| H | 0.072181000  | -2.218486000 | -1.315127000 |
| H | 1.713052000  | -2.474684000 | -1.965359000 |
| H | 1.386382000  | -2.784587000 | -0.254802000 |
| C | -0.277559000 | -0.073224000 | 2.491459000  |
| H | 0.114840000  | 0.874003000  | 2.887619000  |
| H | -1.290073000 | 0.115256000  | 2.103726000  |
| H | -0.368201000 | -0.767382000 | 3.339491000  |
| C | -2.117346000 | -0.044835000 | -0.563693000 |

## References

- [S1] X. Suo, Y. Yu, S. Qian, L. Zhou, X. Cui and H. Xing, *Angew. Chem. Int. Ed.*, 2021, **60**, 6986–6991.
- [S2] X. Cui, Q. Yang, L. Yang, R. Krishna, Z. Zhang, Z. Bao, H. Wu, Q. Ren, W. Zhou, B. Chen and H. Xing, *Adv. Mater.*, 2017, **29**, 1606929.
- [S3] Q. Zhu, F. Li, Y. Zheng, Y. Cao, Y. Xiao, S. Liang, F. Liu and L. Jiang, *Sep. and Purif. Technol.*, 2022, **284**, 120272.
- [S4] J. M. Rosas, R. Ruiz-Rosas, J. Rodríguez-Mirasol and T. Cordero, *Chem. Eng. J.*, 2017, **307**, 707–721.
- [S5] Y. Fu, Z. Wang, S. Li, X. He, C. Pan, J. Yan and G. Yu, *ACS Appl. Mater. Inter.*, 2018, **10**, 36002–36009.
- [S6] P. Brandt, A. Nuhnen, M. Lange, J. Möllmer, O. Weingart and C. Janiak, *ACS Appl. Mater. Inter.*, 2019, **11**, 17350–17358.
- [S7] K. Tan, P. Canepa, Q. Gong, J. Liu, D. H. Johnson, A. Dyevoich, P. K. Thallapally, T. Thonhauser, J. Li and Y. J. Chabal, *Chem. Mater.*, 2013, **25**, 4653–4662.
- [S8] J. H. Carter, X. Han, F. Y. Moreau, I. da Silva, A. Nevin, H. G. W. Godfrey, C. C. Tang, S. Yang and M. Schröder, *J. Am. Chem. Soc.*, 2018, **140**, 15564–15567.
- [S9] M. Savage, Y. Cheng, T. L. Easun, J. E. Eyley, S. P. Argent, M. R. Warren, W. Lewis, C. Murray, C. C. Tang, M. D. Frogley, G. Cinque, J. Sun, S. Rudić, R. T. Murden, M. J. Benham, A. N. Fitch, A. J. Blake, A. J. Ramirez-Cuesta, S. Yang and M. Schröder, *Adv. Mater.*, 2016, **28**, 8705–8711.
- [S10] S. Yang, J. Sun, A. J. Ramirez-Cuesta, S. K. Callear, W. I. F. David, D. P. Anderson, R. Newby, A. J. Blake, J. E. Parker, C. C. Tang and M. Schroeder, *Nat. Chem.*, 2012, **4**, 887–894.
- [S11] S. Yang, L. Liu, J. Sun, K. M. Thomas, A. J. Davies, M. W. George, A. J. Blake, A. H. Hill, A. N. Fitch, C. C. Tang and M. Schröder, *J. Am. Chem. Soc.*, 2013, **135**, 4954–4957.

- [S12] X. Cui, Q. Yang, L. Yang, R. Krishna, Z. Zhang, Z. Bao, H. Wu, Q. Ren, W. Zhou, B. Chen and H. Xing, *Adv. Mater.*, 2017, **29**, 1606929.
- [S13] J.-Y. Zhang, J.-B. Zhang, M. Li, Z. Wu, S. Dai and K. Huang, *Chem. Eng. J.*, 2020, **391**, 123579.
- [S14] X.-C. An, Z.-M. Li, Y. Zhou, W. Zhu and D.-J. Tao, *Chem. Eng. J.*, 2020, **394**, 124859.
- [S15] S. Yang, X. Lin, W. Lewis, M. Suyetin, E. Bichoutskaia, J. E. Parker, C. C. Tang, D. R. Allan, P. J. Rizkallah, P. Hubberstey, N. R. Champness, K. M. Thomas, A. J. Blake and M. Schroeder, *Nat. Mater.*, 2012, **11**, 710–716.
- [S16] Z. Han, J. Li, W. Lu, K. Wang, Y. Chern, X. Zhang, L. Lin, X. Han, S. Teat, M. Frogley, S. Yang, W. Shi and P. Cheng, *Angew. Chem. Int. Ed.*, 2022, **61**, e202115585.
- [S17] S. Xing, J. Liang, P. Brandt, F. Schäfer, A. Nuhnen, T. Heinen, I. Boldog, J. Möllmer, M. Lange, O. Weingart and C. Janiak, *Angew. Chem. Int. Ed.*, 2021, **60**, 17998–18005.
- [S18] M. J. Yin, X. H. Xiong, X. F. Feng, W. Y. Xu, R. Krishna and F. Luo, *Inorg. Chem.*, 2021, **60**, 3447–3451.
- [S19] Y.-B. Ren, H.-Y. Xu, S.-Q. Gang, Y.-J. Gao, X. Jing and J.-L. Du, *Chem. Eng. J.*, 2022, **431**, 134057.
- [S20] H.-C. Lan, Y.-T. Zou, Y.-C. Wang, N.-N. Cheng, W.-L. Xu, H.-L. Peng, K. Huang, L.-Y. Kong and J. Du, *Chem. Eng. J.*, 2021, **422**, 129699.
- [S21] M. J. Frisch, G. W. Trucks, H. B. Schlegel, G. E. Scuseria, M. A. Robb, J. R. Cheeseman, G. Scalmani, V. Barone, G. A. Petersson, H. Nakatsuji, X. Li, M. Caricato, A. V. Marenich, J. Bloino, B. G. Janesko, R. Gomperts, B. Mennucci, H. P. Hratchian, J. V. Ortiz, A. F. Izmaylov, J. L. Sonnenberg, D. Williams-Young, F. Ding, F. Lipparini, F. Egidi, J. Goings, B. Peng, A. Petrone, T. Henderson, D. Ranasinghe, V. G. Zakrzewski, J. Gao, N. Rega, G. Zheng, W. Liang, M. Hada, M. Ehara, K. Toyota, R. Fukuda, J. Hasegawa, M. Ishida, T. Nakajima, Y. Honda, O. Kitao, H. Nakai, T. Vreven, K. Throssell, J. A. Montgomery, Jr., J. E.

Peralta, F. Ogliaro, M. J. Bearpark, J. J. Heyd, E. N. Brothers, K. N. Kudin, V. N. Staroverov, T. A. Keith, R. Kobayashi, J. Normand, K. Raghavachari, A. P. Rendell, J. C. Burant, S. S. Iyengar, J. Tomasi, M. Cossi, J. M. Millam, M. Klene, C. Adamo, R. Cammi, J. W. Ochterski, R. L. Martin, K. Morokuma, O. Farkas, J. B. Foresman and D. J. Fox, Gaussian 16 Revision A.03, Gaussian, Inc, *Wallingford CT*, 2016.

[S22] J.-D. Chai and M. Head-Gordon, *Phys. Chem. Chem. Phys.*, 2008, **10**, 6615–6620.

[S23] F. Weigend and R. Ahlrichs, *Phys. Chem. Chem. Phys.*, 2005, **7**, 3297–3305.
